# Supplementary material for: Polyvinylpyrrolidone-stabilized magnetic nickel nanochains for cancer hyperthermia and catalysis applications
Source: Royal Society of Chemistry journal article supplement (doi:10.1039/c4ra10545a), 2015-01-01
Supplement: c4ra10545a1.pdf [file c4ra10545a1.pdf]

## Supporting Information

# Polyvinylpyrrolidone-stabilized magnetic nickel nanochains for cancer hyperthermia and catalysis applications

Jian Wu,<sup>a,b</sup> Wei Zhou,<sup>c</sup> Qingmei Cheng,<sup>d</sup> and Jinglei Yang<sup>\*a</sup>

<sup>a</sup> School of Mechanical and Aerospace Engineering, Nanyang Technological University, Nanyang 639798, Singapore.

<sup>b</sup> State Key Laboratory of Coal Conversion, Institute of Coal Chemistry, Chinese Academy of Sciences, Taiyuan, Shanxi 030001, P. R. China.

<sup>c</sup> Hefei National Laboratory for Physical Sciences at the Microscale, University of Science and Technology of China, Hefei, Anhui 230026, P. R. China.

<sup>d</sup> Department of Chemistry, Merkert Chemistry Center, Boston College, Chestnut Hill, MA 02467. USA.

Corresponding author's email: E-mail: mjlyang@ntu.edu.sg

### S1 Characterizations

Attenuated total reflectance-Fourier transform infrared spectroscopy (ATR-FTIR) spectra were recorded by Perkin Elmer Frontier FT-NIR/MIR spectrometers. Spectra were obtained with resolution of 2 cm<sup>-1</sup> and 16 scans. Thermal gravimetric analysis (TGA) of the as-synthesized samples were carried out on a Shimadzu TA-50 thermal analyzer at a heating rate of 10 °C/min from room temperature to 800 °C in air. Zeta potential and DLS measurements were performed using a Malvern 4800 Autosizer employing a 7132 digital correlator for the determination of the hydrodynamic diameter. Measurements were taken in water. HCL (0.2 M) and NaOH (0.2 M) are used to tune the pH from 2 to 10. The pH adjustment is achieved by using pH meters. The reported zeta potential values were an average of three measurements.

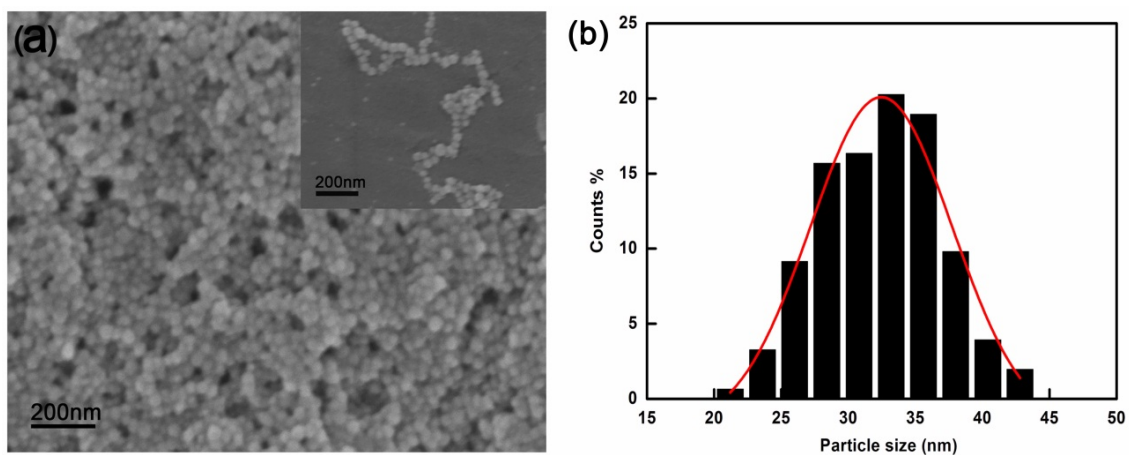

**Figure S1** (a) SEM images of Ni-NC@PVP. (b) The histogram of grain size distribution of Ni-NC@PVP from TEM in Figure 1c.

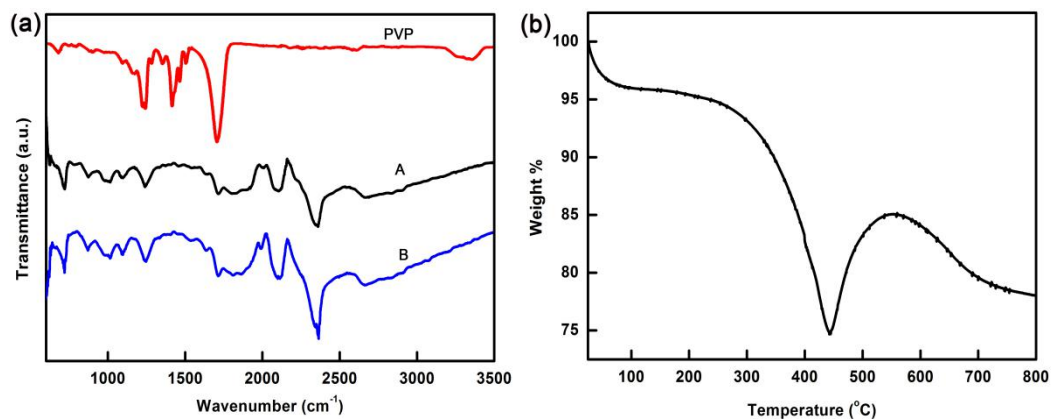

**Figure S2** (a) FTIR spectra of Ni-NC@PVP before (A) and after (B) the catalytic test reaction and pure PVP. (b) Thermogravimetric analysis (TGA) under air of Ni-NC@PVP.

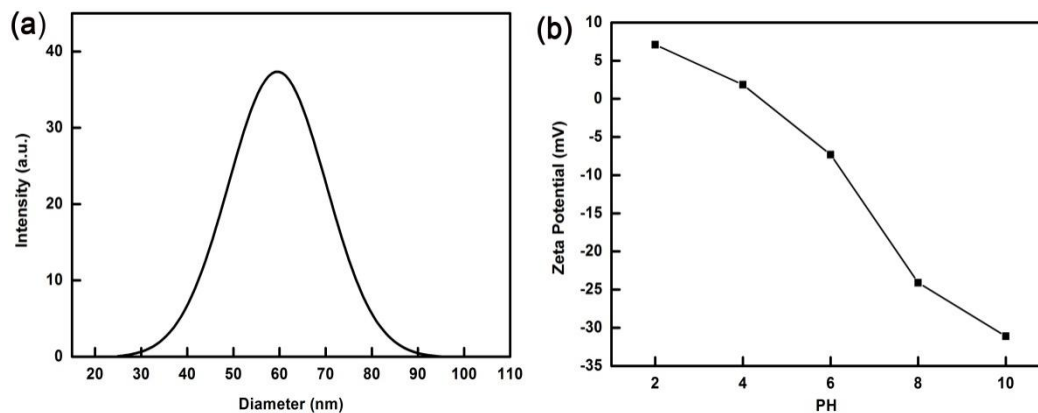

**Figure S3** (a) DLS analysis of Ni-NC@PVP. (b) Zeta potential as a function of pH for Ni-NC@PVP dispersed in water.

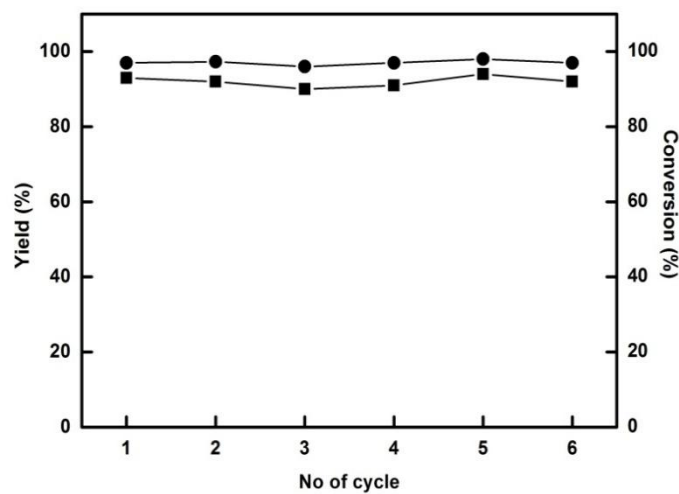

**Figure S4** Effect of reaction conditions on the conversion of acetophenone (up) and yield of 1-phenylethanol (below) over Ni-NC@PVP catalyst over six cycles. The yield of 1-phenylethanol and conversion of acetophenone were determined by GC analysis using external standard method.

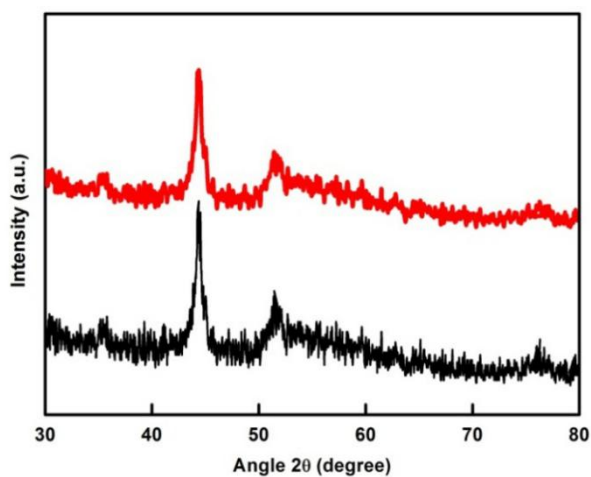

**Figure S5** XRD pattern of Ni-NC@PVP before (below) and after (up) the catalytic test reaction.

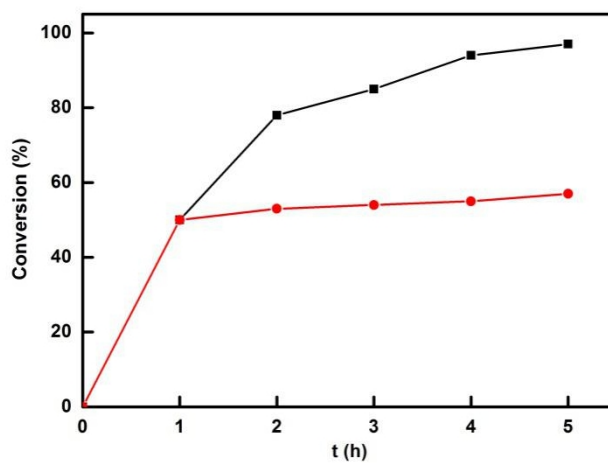

**Figure S6** Kinetic profile for the (a) Ni-NC@PVP-catalyzed hydrogenation of acetophenone (square); (b) the reaction mixture at 51 % conversion (cycle) was centrifuged to remove the catalyst.
